# Supplementary material
Source: MDPI journal article supplement (https://www.mdpi.com/2072-4292/12/5/751)
Supplement: s1 [file s1]

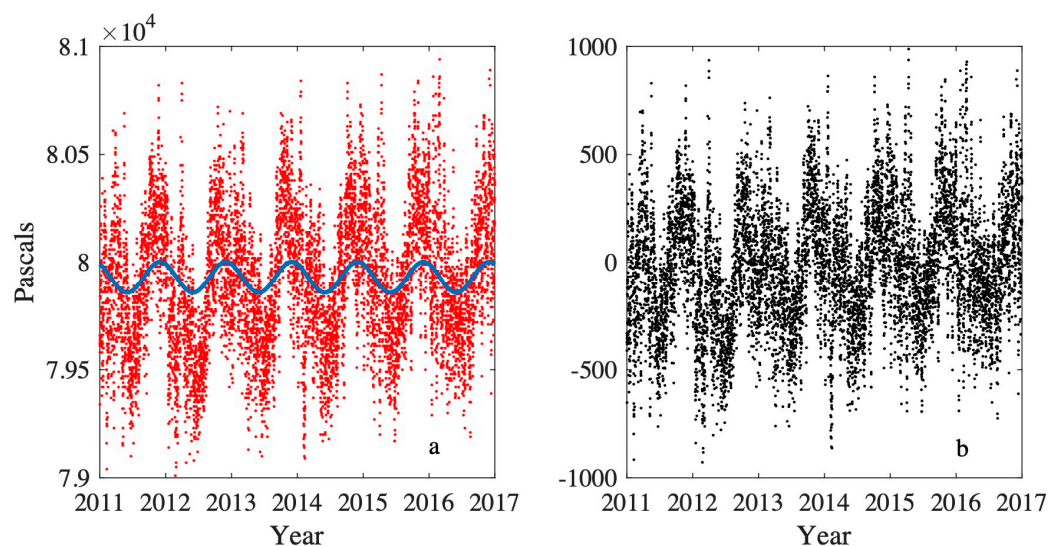

Figure S1 (a) The atmosphere pressure variations (red) at point (25°N, 102.5°E) and the modeled seasonal variations with sinusoids (blue lines). (b) The atmosphere pressure residual timeseries with linear trend and seasonal terms removal.

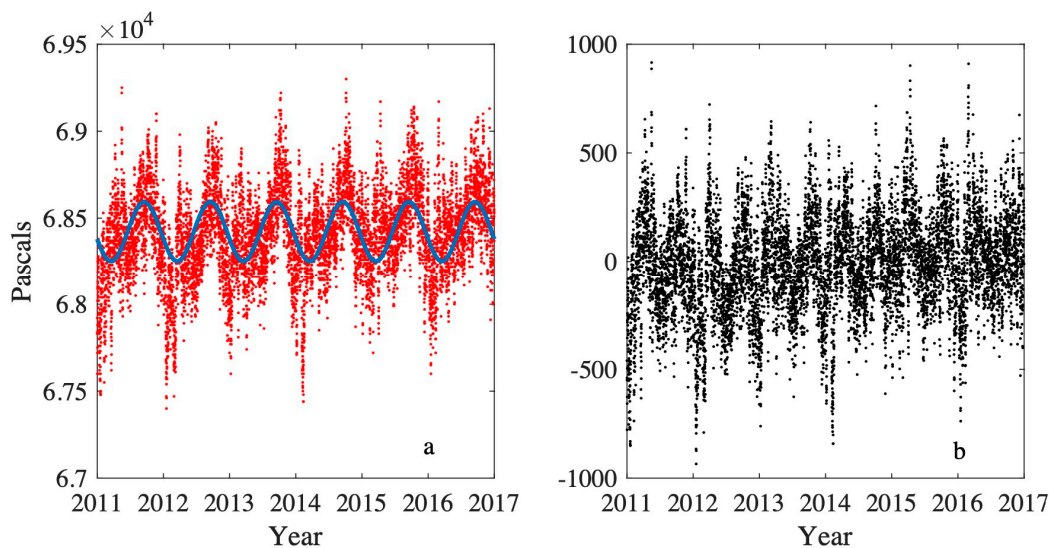

Figure S2 (a) The atmosphere pressure variations (red) at point (27.5°N, 100°E) and the modeled seasonal variations with sinusoids (blue lines). (b) The atmosphere pressure residual timeseries with linear trend and seasonal terms removal.

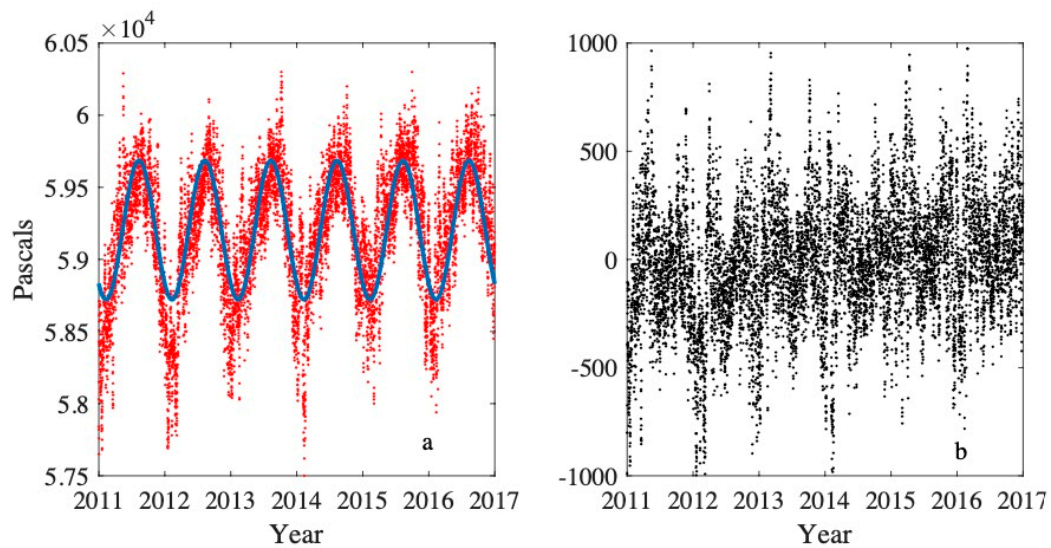

Figure S3 **(a)** The atmosphere pressure variations (red) at point (32.5°N, 100°E) and the modeled seasonal variations with sinusoids (blue lines). **(b)** The atmosphere pressure residual timeseries with linear trend and seasonal terms removal.
